# Supplementary material for: Dihydrotanshinone I exhibits antitumor effects via β-catenin downregulation in papillary thyroid cancer cell lines
Source: PubMed Central journal article supplement (PMC10991365; doi:10.1038/s41598-024-58495-9), 2024-04-03

# Original blots for Figure 2A

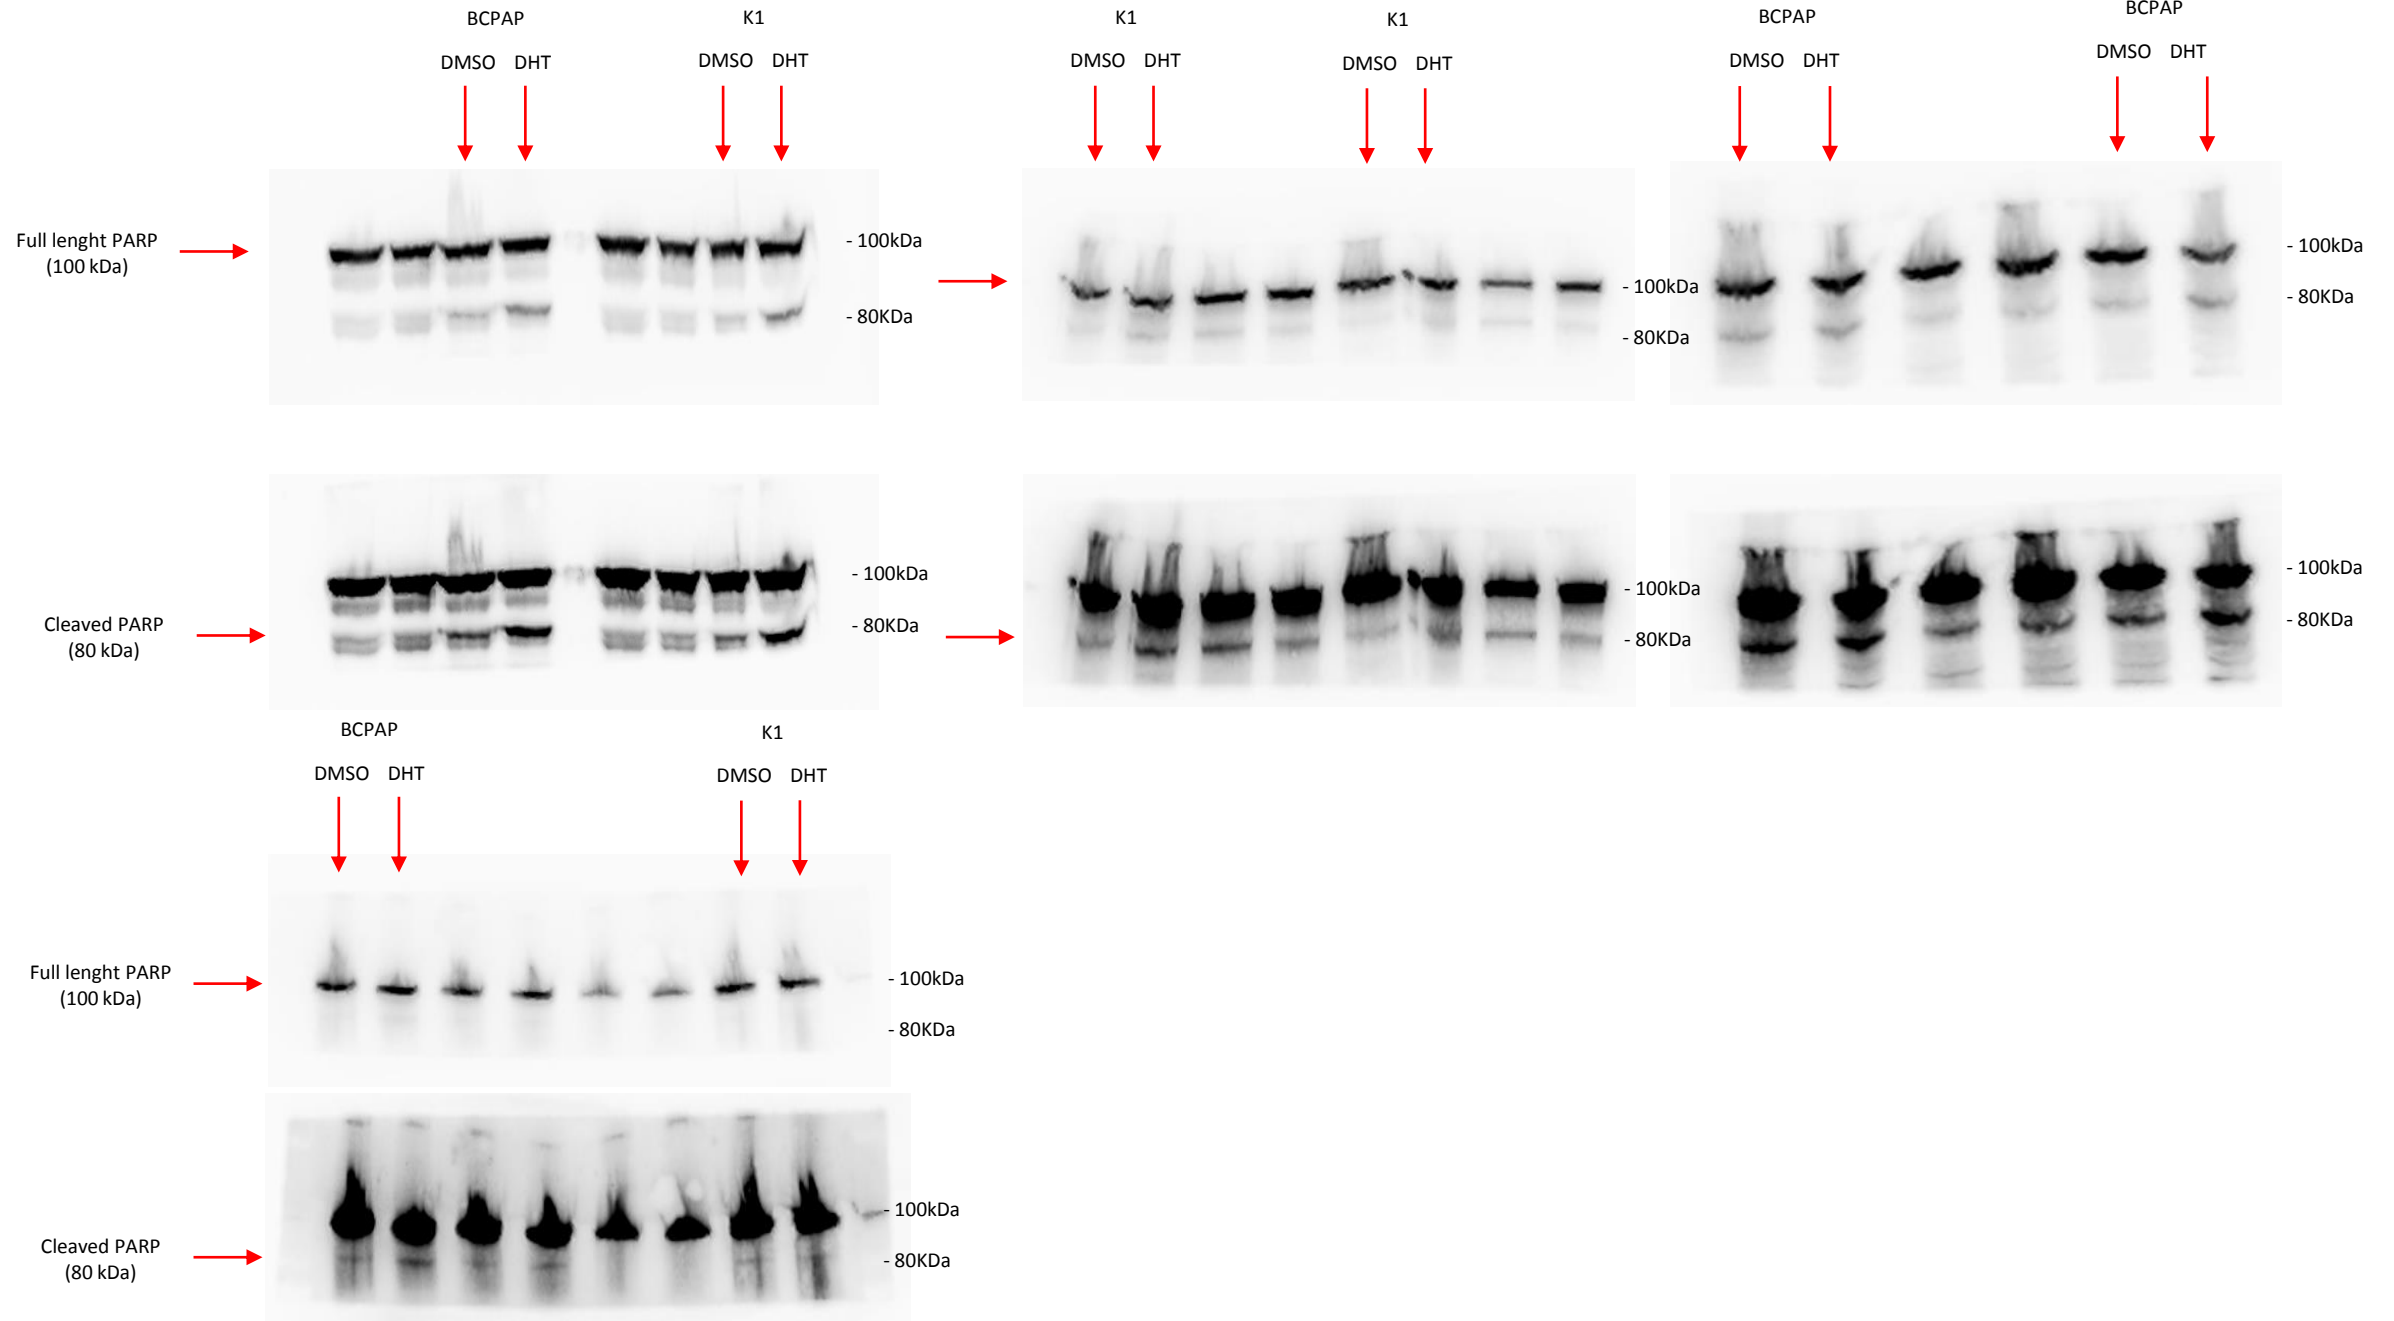

# Original blots for Figure 7A

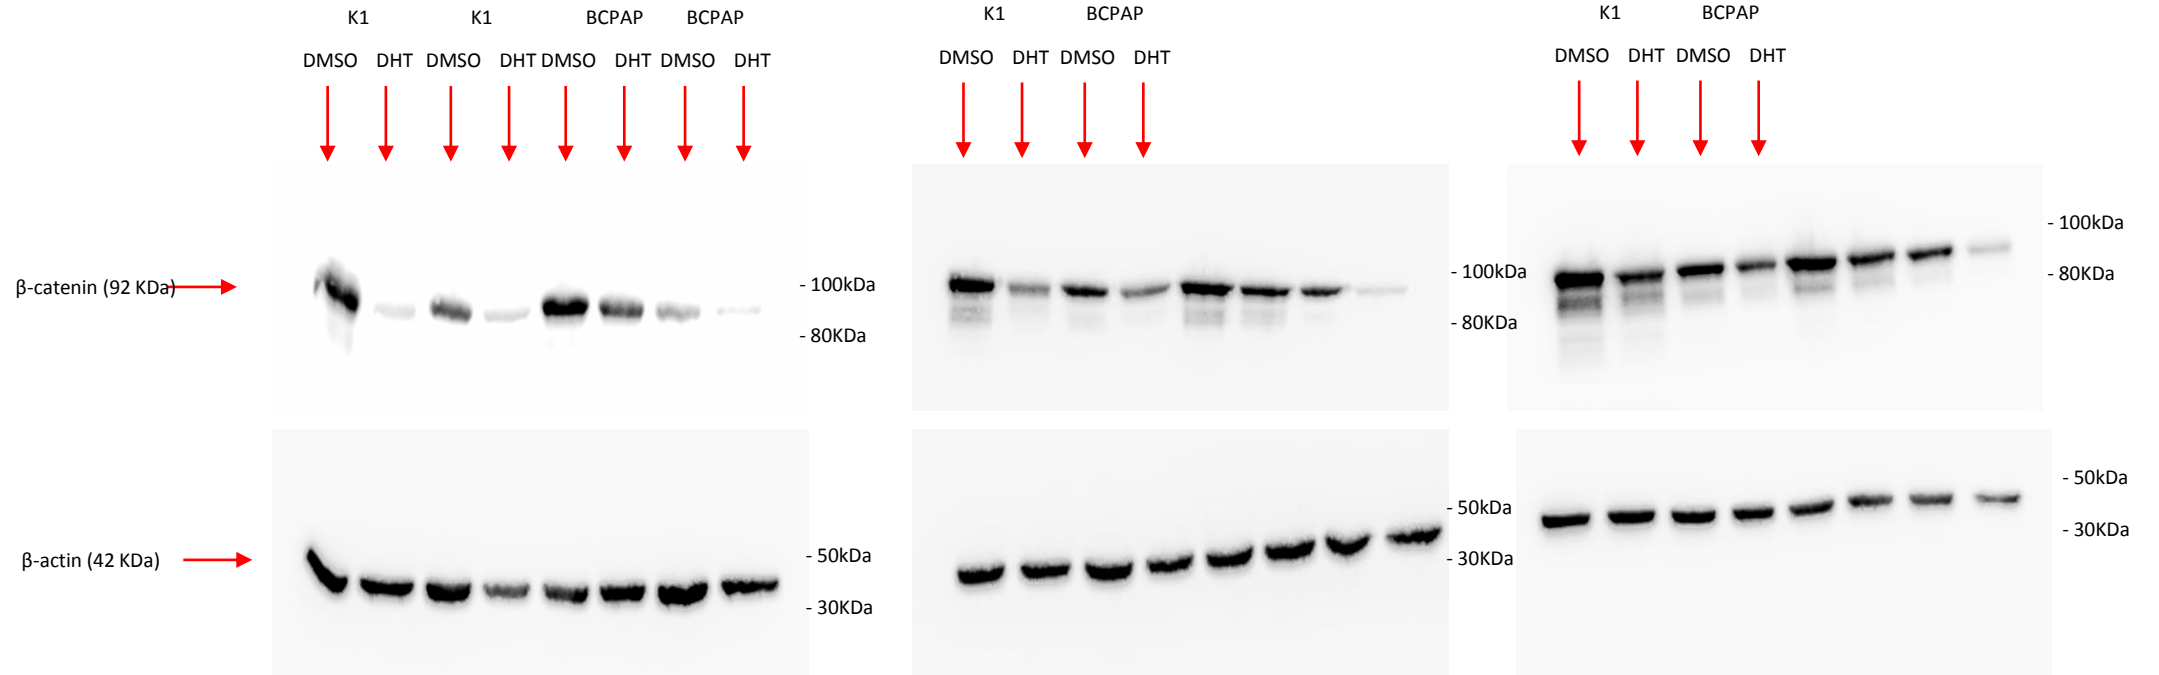

Supplement: 41598_2024_58495_MOESM1_ESM.pdf [file 41598_2024_58495_MOESM1_ESM.pdf]
