# Supplementary material for: Dihydrotanshinone I exhibits antitumor effects via β-catenin downregulation in papillary thyroid cancer cell lines
Source: PubMed Central journal article supplement (PMC10991365; doi:10.1038/s41598-024-58495-9), 2024-04-03
Supplement: 41598_2024_58495_MOESM2_ESM.pdf [file 41598_2024_58495_MOESM2_ESM.pdf]

Dihidrotanshinone I exhibits antitumor effects via  $\beta$ -catenin downregulation in papillary thyroid cancer cell lines, by Elisabetta Molteni, Federica Baldan, Giuseppe Damante and Lorenzo Allegri.

|              |             | 24h  | 48h  | 72h  |
|--------------|-------------|------|------|------|
| <i>K1</i>    | 0.5 $\mu$ M | **   | **   | **   |
|              | 1 $\mu$ M   | ***  | **** | ***  |
|              | 1.5 $\mu$ M | **   | **** | **** |
|              | 3 $\mu$ M   | **** | **** | **** |
| <i>BCPAP</i> | 0.5 $\mu$ M | **** | **** | ***  |
|              | 1 $\mu$ M   | ***  | **** | **** |
|              | 1.5 $\mu$ M | **** | **** | **** |
|              | 3 $\mu$ M   | **** | **** | **** |

**Supplementary Table S1. p-value of the MTT assay with DHT.** p-values obtained in the MTT assay with different doses of DHT (from 0.5  $\mu$ M to 3  $\mu$ M) compared with the control treatment (DMSO) are enlisted here. \*\* p < 0.01, \*\*\* p < 0.001, \*\*\*\* p < 0.0001
